# Supplementary material for: Critical Role of Zinc in a New Murine Model of Enterotoxigenic Escherichia coli Diarrhea
Source: PubMed Central journal article supplement (PMC6013668; doi:10.1128/iai.00183-18), 2018-06-21
Supplement: IAI.00183-18_zii999092441s1.pdf [file IAI.00183-18_zii999092441s1.pdf]

Supplemental Table 1

Primer sequences

| Gene target | Sequences                      |
|-------------|--------------------------------|
| <i>sta2</i> | F: 5'-3' CACCCGGTACAAGCAGGATT  |
|             | R: 5'-3' TTCACCTTTCGCTCAGGATG  |
| <i>eltA</i> | F: 5'-3' CAAAGCCGGTTTGTGTTCT   |
|             | R: 5'-3' TGCTGACTCTAGACCCCCAGA |
| <i>cfa1</i> | F: 5'-3' TCAGTGTGTCATGGGGAGGA  |
|             | R: 5'-3' ACCGGCAGTTTTAGGTGCAG  |
| <i>cexE</i> | F: 5'-3' AGTCCGATGCATGGCTACAC  |
|             | R: 5'-3' TGGCTATGGGGTCTCTCTCC  |
| <i>degP</i> | F: 5'-3' CTGACCCTGGGCTTACTGCG  |
|             | R: 5'-3' CCACGCCCTG ATCTTTGCCT |
